# Supplementary material
Source: PubMed Central journal article supplement (PMC8240491)
Supplement: str-52-2422-s001.pdf [file str-52-2422-s001.pdf]

## **SUPPLEMENTAL MATERIAL**

Supplemental Table I:

**Cerebral blood flow velocities in MCA (M1) and corresponding lab data in COVID-19 positive (P) and negative (N) patients at time of TCD.**

| Patient Number | COVID-19 Status | Stroke Y/N | CBFV (M1) R/L | Fibrinogen (mg/dL) | CRP (mg/L) | D-Dimer (mg/L) |
|----------------|-----------------|------------|---------------|--------------------|------------|----------------|
| 1              | P               | N          | 48/44         | 495                | 16.2       | 30             |
| 2              | P               | N          | 50/50         | 495                | 6.3        | 232            |
| 3              | P               | N          | 48/45         | 733                | 11.7       | 1.61           |
| 4              | P               | N          | 48/48         | 511                | 5.9        | 0.89           |
| 5              | P               | N          | 49/53         | 859                | 8.7        | 3.51           |
| 6              | P               | N          | 51/51         | 883                | 37.6       | 30             |
| 7              | P               | N          | 47/55         | 907                | --         | 3.44           |
| 8              | P               | N          | 48/48         | 883                | 17         | 2.24           |
| 9              | P               | N          | 42/33         | --                 | 5.2        | 9.78           |
| 10             | P               | N          | 48/44         | 845                | 32.5       | 1.71           |
| 11             | P               | N          | 61/63         | --                 | 37.4       | --             |
| 12             | P               | N          | 41/35         | 511                | 9.1        | 18.77          |
| 13             | P               | N          | 39/27         | 255                | --         | 30             |
| 14             | P               | N          | 45/47         | 545                | 1.9        | 11.51          |
| 15             | P               | Y          | 48/45         | 387                | 6.1        | 4.16           |
| 16             | P               | Y          | 44/38         | --                 | 9.9        | 19.16          |
| 1              | N               | Y          | 146/158       | --                 | 227.4      | 3.54           |
| 2              | N               | Y          | 95/82         | 571                | 330.9      | 30             |
| 2              | N               | Y          | 44/38         | --                 | 9.9        | 19.16          |
| 3              | N               | Y          | 60/69         | 393                | --         | --             |
| 4              | N               | Y          | 56/55         | --                 | --         | --             |
| 5              | N               | Y          | 87/87         | 458                | --         | --             |
| 6              | N               | Y          | 69/45         | 418                | --         | --             |
| 7              | N               | Y          | 66/54         | --                 | --         | --             |
| 8              | N               | Y          | 59/64         | --                 | --         | --             |
| 9              | N               | Y          | 53/37         | --                 | --         | --             |
| 10             | N               | Y          | 105/120       | --                 | --         | --             |

\*Normal values: Fibrinogen: 170-422 mg/dL; C reactive protein (CRP): <0.5 mg/dL; D-dimer: 0.00-0.49 mg/L.
